# Supplementary material for: A Comparison of the Evaporative Emissions Performance of Light-Duty Vehicles under US Tier 3 and China 6 Test Conditions
Source: MDPI journal article supplement (doi:10.3390/atmos14071128), 2023-07-07
Supplement: s1 [file s1]

# A Comparison of the Evaporative Emissions Performance of Light-Duty Vehicles under U.S. Tier 3 and China 6 Test Conditions

Di Peng, Miao Tian, Fei Yi, Xinping Yang, Liang Ji, Junfang Wang, Hang Yin, Yan Ding and Haiguang Zhao \*

Table S1. Diurnal evaporative emission comparison: U.S. EPA Tier 3 and China 6 Test Conditions.

| Test Vehicle       |           | U.S. EPA 2-day  |           |           |                          |                        |
|--------------------|-----------|-----------------|-----------|-----------|--------------------------|------------------------|
|                    | Purge (L) | Hot Soak (g)    | Day 1 (g) | Day 2 (g) | Maximum (Day1, Day2) (g) | Hot Soak + Diurnal (g) |
| A                  | 308       | 0.034           | 0.127     | 0.093     | 0.127                    | 0.161                  |
| B                  | No test   | 0.056           | 0.119     | 0.068     | 0.119                    | 0.175                  |
| C                  | 304       | 0.016           | 0.143     | 0.115     | 0.143                    | 0.159                  |
| Average of Tier 3  | 306       | 0.035           | 0.130     | 0.092     | 0.130                    | 0.165                  |
| D                  | 170       | 0.028           | 0.305     | 0.426     | 0.426                    | 0.454                  |
| E                  | No test   | No test         | No test   | No test   | No test                  | No test                |
| Average of China 6 | 170       | 0.028           | 0.305     | 0.426     | 0.426                    | 0.454                  |
| Test Vehicle       |           | China 2-day 38C |           |           |                          |                        |
|                    | Purge (L) | Hot Soak (g)    | Day 1 (g) | Day 2 (g) | Maximum (Day1, Day2) (g) | Hot Soak + Diurnal (g) |
| A                  | 331       | 0.090           | 0.143     | 0.102     | 0.143                    | 0.233                  |
| B                  | No test   | 0.074           | 0.180     | 0.127     | 0.180                    | 0.254                  |
| C                  | 358       | 0.061           | 0.131     | 0.112     | 0.131                    | 0.192                  |
| Average of Tier 3  | 334.5     | 0.075           | 0.151     | 0.113     | 0.151                    | 0.226                  |
| D                  | 253       | 0.083           | 0.175     | 0.155     | 0.175                    | 0.258                  |
| E                  | No test   | 0.122           | 0.197     | 0.153     | 0.197                    | 0.319                  |
| Average of China 6 | 253       | 0.103           | 0.186     | 0.154     | 0.186                    | 0.289                  |

Table S2. Canister BETP comparison: U.S. EPA Tier 3 and China 6 Test Conditions.

| Test Vehicle       |           | U.S. EPA BETP 25°C |           |                          |
|--------------------|-----------|--------------------|-----------|--------------------------|
|                    | Purge (L) | Day 1 (g)          | Day 2 (g) | Maximum (Day1, Day2) (g) |
| A                  | 292       | 0.007              | 0.008     | 0.008                    |
| B                  | No test   | 0.008              | 0.007     | 0.008                    |
| C                  | 304       | 0.006              | 0.006     | 0.006                    |
| Average of Tier 3  | 298       | 0.007              | 0.007     | 0.007                    |
| D                  | 170       | 0.319              | 0.336     | 0.336                    |
| E                  | No test   | No test            | No test   | No test                  |
| Average of China 6 | 170       | 0.319              | 0.336     | 0.336                    |
| Test Vehicle       |           | China BETP 25°C    |           |                          |
|                    | Purge (L) | Day 1 (g)          | Day 2 (g) | Maximum (Day1, Day2) (g) |

|                           |            |              |              |              |
|---------------------------|------------|--------------|--------------|--------------|
| <b>A</b>                  | 289        | 0.008        | 0.007        | 0.008        |
| <b>B</b>                  | No test    | No test      | No test      | No test      |
| <b>C</b>                  | 205        | 0.004        | 0.008        | 0.008        |
| <b>Average of Tier 3</b>  | <b>247</b> | <b>0.006</b> | <b>0.007</b> | <b>0.008</b> |
| <b>D</b>                  | 279        | 0.171        | 0.192        | 0.192        |
| <b>E</b>                  | No test    | 0.089        | 0.103        | 0.103        |
| <b>Average of China 6</b> | <b>279</b> | <b>0.130</b> | <b>0.148</b> | <b>0.148</b> |

**Table S3.** Comparison of China 6 and U.S. Tier 3 hot soak and diurnal evaporative emissions certification values.

|                                         | <b>Average (g)</b> | <b>Standard Deviation (g)</b> | <b>Minimum (g)</b> | <b>Maximum (g)</b> |
|-----------------------------------------|--------------------|-------------------------------|--------------------|--------------------|
| <b>U.S. Tier 3 hot soak and diurnal</b> | 0.201              | 0.040                         | 0.119              | 0.300              |
| <b>U.S. Tier 3 BETP</b>                 | 0.008              | 0.005                         | 0.000              | 0.020              |
| <b>China 6 hot soak and diurnal</b>     | 0.423              | 0.123                         | 0.170              | 0.826              |

**Table S4.** Comparison of China 6 and U.S. Tier 3 hot soak and diurnal evaporative emissions certification values.

| <b>The reduction potential of evaporative emissions of Tier 3 vs. China 6 vehicles using the Pre-China 7 study</b> |                                            |                          |
|--------------------------------------------------------------------------------------------------------------------|--------------------------------------------|--------------------------|
| <b>2-day Evaporative Emissions (U.S. EPA Test Conditions)</b>                                                      | <b>Grams per Vehicle per Day Reduction</b> | <b>Percent reduction</b> |
| <b>Full Vehicle SHED</b>                                                                                           | 0.29                                       | 64%                      |
| <b>Canister BETP</b>                                                                                               | 0.33                                       | 98%                      |
